# Supplementary material
Source: publisher figshare collection journal article supplement (https://acs.figshare.com/ndownloader/files/5100202)

## Supporting Information for

### A Structural and Spectroscopic Study of Reactions between Chelating Zinc-Binding Groups and Mimics of the MMP and ADAM Catalytic Sites: The Coordination Chemistry of Metalloprotease Inhibition

**Hongshan He<sup>‡</sup>, David T. Puerta<sup>‡</sup>, Seth M. Cohen<sup>‡</sup>, and Kenton R. Rodgers<sup>‡\*</sup>**

<sup>‡</sup>Department of Chemistry, Biochemistry, and Molecular Biology  
North Dakota State University  
Fargo, North Dakota 58105-5516

<sup>‡</sup>Department of Chemistry and Biochemistry  
University of California, San Diego  
La Jolla, California 92093-0358

*Running title:* Interaction of zinc-binding ligands with  $[\text{Tp}^{\text{Ph,Me}}\text{Zn}(\text{OH}_n)]^{(n-1)+}$

\* to whom correspondence should be addressed

**Figure S1.** 500 MHz  $^1H$  NMR spectra tracking the titration of  $[Tp^{Ph,Me}ZnOH]$  with 4-ImHPr in  $CD_3OD$  at 25.0 °C. Solid lines mark resonances from bound 4-ImPr $^-$ , dotted lines indicate the intermediate species, and \* marks resonances due to free 4-ImHPr.

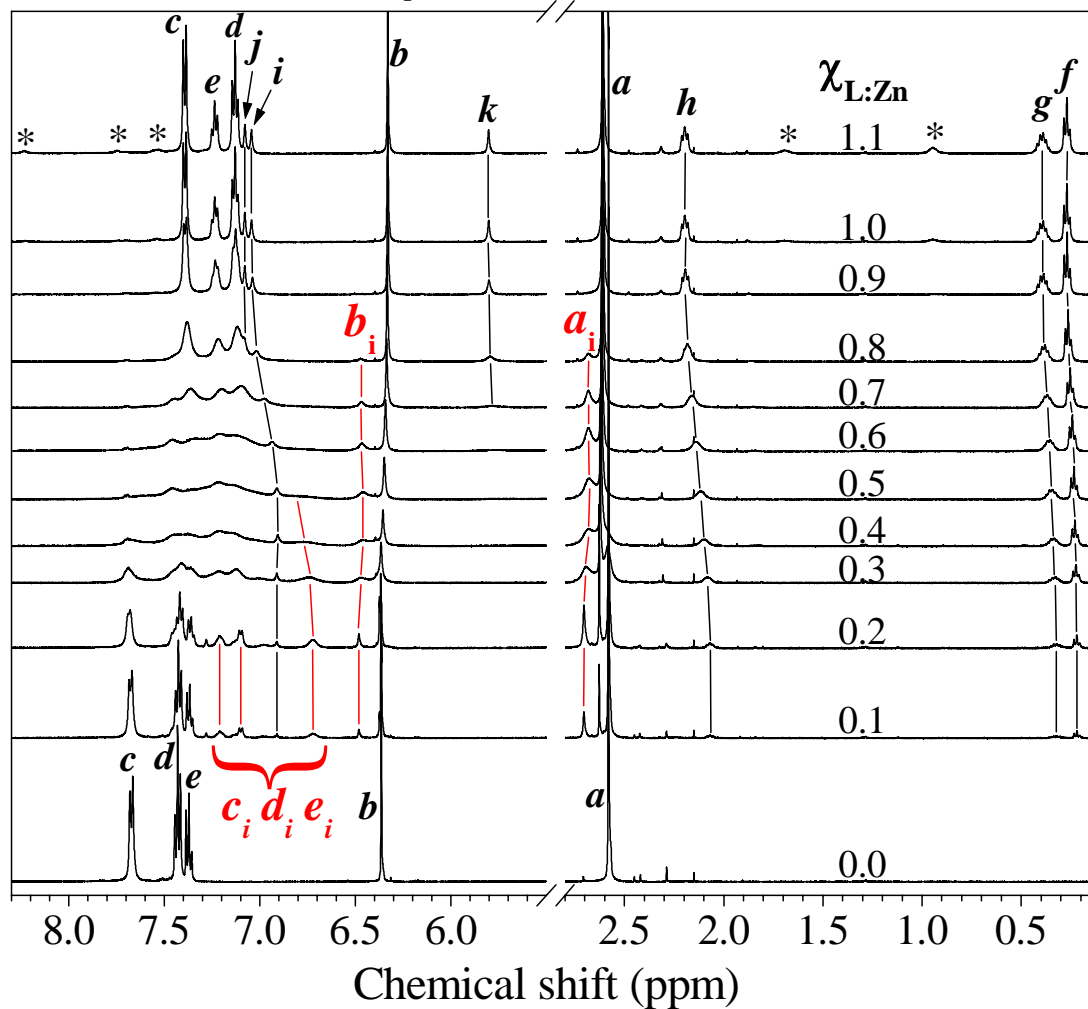

**Figure S2.**  $^1H$  NMR spectra tracking titration of  $[Tp^{Ph,Me}ZnOH]$  in  $CDCl_3$  with a  $CD_3OD$  solution of 2-HOPhPr at 25 °C. Residual water is indicated by \*. Arrow heads indicate resonances from unbound 2-HOPhPr.

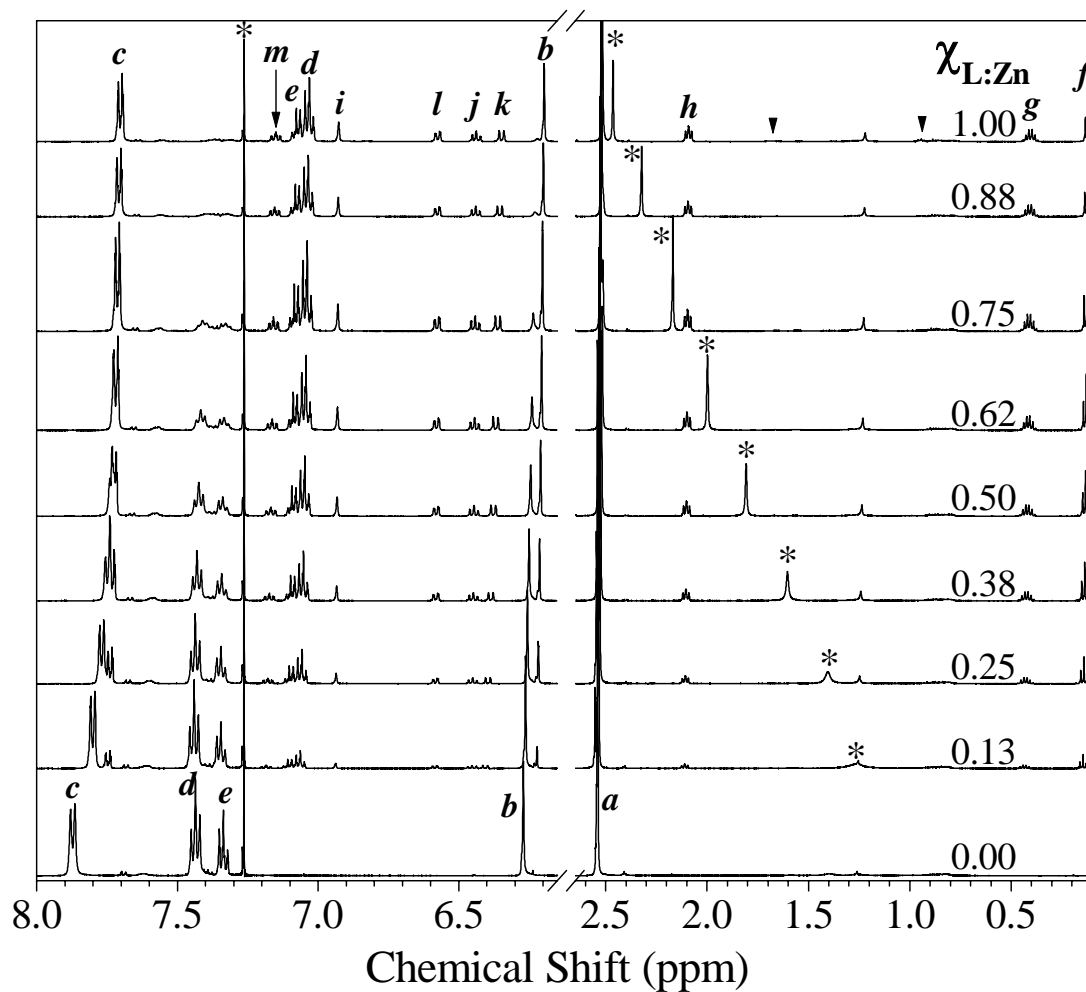

**Figure S3.**  $^1H$  NMR spectra tracking the titration of  $[Tp^{Ph,Me}ZnOH]$  with 1-Me-2-ImPr and  $HClO_4$  in  $CD_3OD$  at  $25^\circ C$ . The solid lines track the indicated 1-Me-2-ImPr resonances. Assignments of *i* and *k* in the final titration spectra are tentative. \* marks methanol resonances.

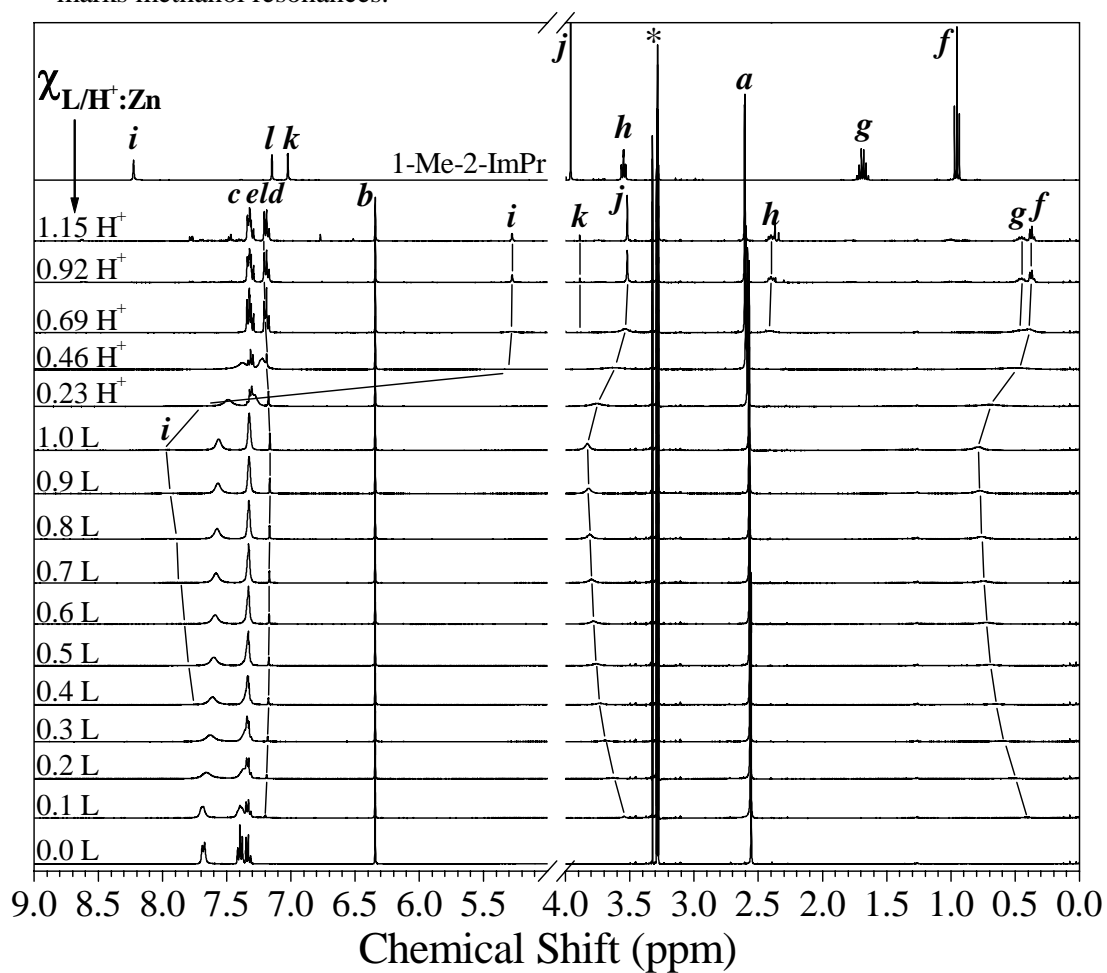

Supplement: Supplementary file 1 [file 5100202]
